# Supplementary material
Source: publisher figshare collection journal article supplement (https://diabetesjournals.figshare.com/ndownloader/files/25742246)
Supplement: Supplementary file 1 [file 25742246]

## Supplementary Data

**Supplementary Table 1:** Process of Identification of Incident cardiovascular Events in the ARIC Study

| Events                             | ICD codes used for case identification in hospital records                                                                |                                                                                           | Adjudication by a physician reviewers panel                                                                                                                                                                                                                                                                                                                                                                                                       |
|------------------------------------|---------------------------------------------------------------------------------------------------------------------------|-------------------------------------------------------------------------------------------|---------------------------------------------------------------------------------------------------------------------------------------------------------------------------------------------------------------------------------------------------------------------------------------------------------------------------------------------------------------------------------------------------------------------------------------------------|
|                                    | ICD9 codes                                                                                                                | ICD-10 codes                                                                              | Criteria                                                                                                                                                                                                                                                                                                                                                                                                                                          |
| Coronary heart disease death       | 250, 401, 402, 410-414, 427-429, 440, 518.4, 798, 799<br>(years 1987-1998)                                                | E10-14, I10-11, I21-25, I46-51, I70, I97, J81, J96, R96, R98-99<br>(years 1999 and after) | A computer algorithm and study physician categorize all possible incident coronary heart disease death; an additional study reviewer adjudicates discrepancies                                                                                                                                                                                                                                                                                    |
| Hospitalized myocardial infarction | 402, 410-414, 427, 428, 518.4                                                                                             | I11.x, I20.x, I21.x, I22.x, I24.x, I25.x, I46.x, I47.x, I48.x, I49.x, I50.x, J81.0, R00.1 | A computer algorithm and study physician categorize all possible incident myocardial infarction events; an additional study reviewer adjudicates discrepancies.                                                                                                                                                                                                                                                                                   |
| Stroke                             | 430 to 436                                                                                                                | I60 to I64 and G45                                                                        | Based on National Survey of Stroke criteria (1), a computer algorithm and study physician categorize all possible incident stroke events; an additional study reviewer adjudicates discrepancies.                                                                                                                                                                                                                                                 |
| Heart Failure                      | 398.91, 402.01, 402.11, 402.91, 404.01, 404.03, 404.11, 404.13, 404.91, 404.93, 415.0, 416.9, 425.4, 428.x, 518.4, 786.0x | -                                                                                         | The criteria used where the Framingham (2), Modified Boston (3), NHANES I (4), and Gothenburg (5).<br><br>Hospitalizations with any disagreement between the above four criteria are reviewed. Two independent reviewers base classification of heart failure (HF) on clinical judgment. A third reviewer adjudicates differences. The resulting clinical judgment classification is definite HF, Possible HF, HF unlikely, or unclassifiable HF. |
| Atrial Fibrillation/Flutter        | 427.3                                                                                                                     | I48                                                                                       | Events certification done by physicians-                                                                                                                                                                                                                                                                                                                                                                                                          |

ICD: International Classification of Diseases.

The ICD codes are used for case identification from the participants' hospital record/death certificate, followed by an adjudication by an ARIC review panel using the relevant criteria.

**Supplementary Table 2: Echocardiographic characteristics of ARIC study participants with diagnosed diabetes (visit 5, 2011-2013) by history of severe hypoglycemia\***

| <b>Indices of cardiac structure/function</b> | <b>No hypoglycemia</b> | <b>Hypoglycemia</b> | <b>p-value</b> |
|----------------------------------------------|------------------------|---------------------|----------------|
| <b>N (%)</b>                                 | 2115 (96.4)            | 79 (3.60)           |                |
| <b>Left ventricular structure indices</b>    |                        |                     |                |
| LVEDD, cm                                    | 4.5 (0.5)              | 4.6 (0.7)           | 0.095          |
| IVS, cm                                      | 1.1 (0.2)              | 1.1 (0.2)           | 0.036          |
| Mean wall thickness, cm                      | 1.0 (0.1)              | 1.1 (0.1)           | 0.034          |
| LV mass, g                                   | 159.5 (47.8)           | 178.7 (65.5)        | 0.003          |
| RWT                                          | 0.4 (0.1)              | 0.4 (0.1)           | 0.64           |
| LVH, n (%)                                   | 137 (7.2)              | 6 (10.3)            | 0.37           |
| <b>Systolic function</b>                     |                        |                     |                |
| LVEF, %                                      | 64.9 (7.1)             | 61.2 (11.7)         | <0.001         |
| LVEDV, mL                                    | 85.2 (26.0)            | 98.9 (47.4)         | <0.001         |
| LVESV, mL                                    | 30.8 (15.0)            | 42.3 (39.5)         | <0.001         |
| GLS, %                                       | -17.5 (2.7)            | -16.7 (3.4)         | 0.021          |
| RV FAC                                       | 0.5 (0.1)              | 0.5 (0.1)           | 0.007          |
| <b>Diastolic function</b>                    |                        |                     |                |
| LA volume, mL                                | 51.1 (19.4)            | 56.7 (21.2)         | 0.029          |
| E wave, cm/s                                 | 69.2 (20.4)            | 70.5 (26.0)         | 0.64           |
| E-A ratio                                    | 0.8 (0.3)              | 0.9 (0.6)           | 0.062          |

Data are mean (standard deviation) or number (percentage), \*participants include those with heart failure. IVS, interventricular septum; LA, left atrial; LVEDD, left ventricular end-diastolic diameter; LVEDV, left ventricular end-diastolic volume; LVEF, left ventricular ejection fraction; LVESV, left ventricular end-systolic volume; LVH, left ventricular hypertrophy; RV FAC, right ventricular fractional area change; RWT, relative wall thickness

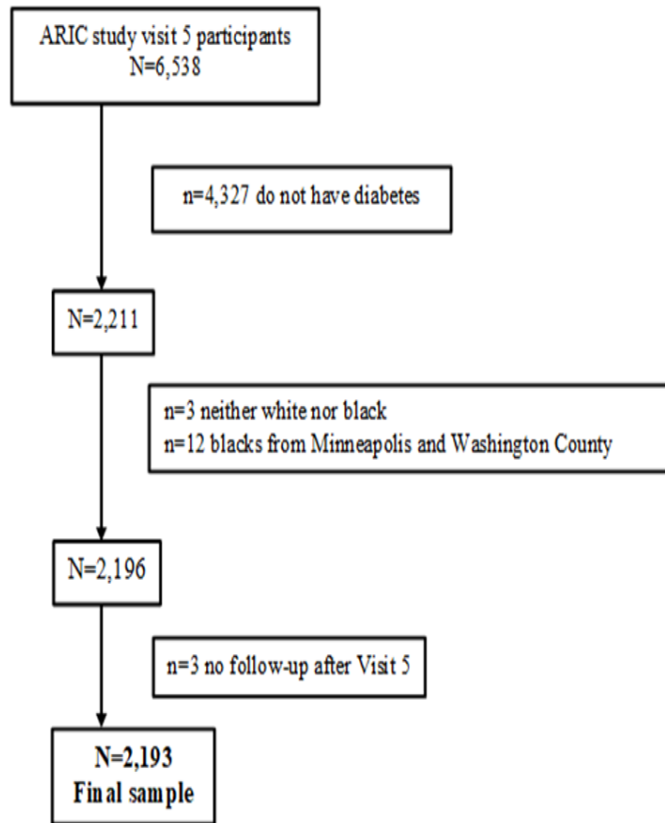

**Supplementary Figure 1.** Process for selecting ARIC study visit 5 participants to examining the association of severe hypoglycemia and cardiovascular outcomes

## References

1. Robins M, Weinfeld FD. The national survey of stroke. Study design and methodology. *Stroke*. 1981;1;12(2 Pt 2 Suppl 1):I7-I11.
2. Ho KKL, Pinsky JL, Kannel WB, Levy D. The epidemiology of heart failure: The Framingham Study. *J Am Coll Cardiol*. 1993;22(4 Suppl A):6A-13A.
3. Carlson KJ, Lee DCS, Goroll AH, Leahy M, Johnson RA. An analysis of physicians' reasons for prescribing long-term digitalis therapy in outpatients. *J Chronic Dis*. 1985;38(9):733-739.
4. Schocken DD, Arrieta MI, Leaverton PE, Ross EA. Prevalence and mortality rate of congestive heart failure in the United States. *J Am Coll Cardiol*. 1992;20(2):301-6.
5. Eriksson H, Caidaul K, Larsson B, Ohlson LO, Welin L, Wilhelmsen L, et al. Cardiac and pulmonary causes of dyspnoea-validation of a scoring test for clinical-epidemiological use: The study of men born in 1913. *Eur Heart J*. 1987;8(9):1007-14.
